# Supplementary material for: Disruption of the Auxin Gradient in the Abscission Zone Area Evokes Asymmetrical Changes Leading to Flower Separation in Yellow Lupine
Source: PubMed Central journal article supplement (PMC7312349; doi:10.3390/ijms21113815), 2020-05-27
Supplement: ijms-21-03815-s001.pdf [file ijms-21-03815-s001.pdf]

**Figure S1.** The methodology of treatment of abscission zone (AZ) and further material collection. Treatment with 2,3,5-triiodobenzoic acid (TIBA, at concentration 0.05 mM in 0.05% Tween 20) was performed. The solution was applied precisely with a tiny brush on the AZ fragments situated at the base of the flower pedicel. At the same time, inactive AZ (IN) served as control was treated with 0.05% Tween 20 only.

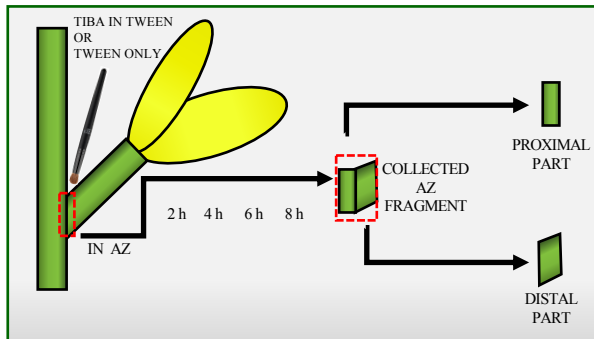

**Table S1.** The primers and probes used in the qPCR reactions.  
All primers were synthesized by Genomed (Warsaw, Poland).

| <b>Gene</b>  | <b>GeneBank accession no.</b> | <b>Primer sequence 5'-3'</b>                            | <b>UPL probe no.</b> |
|--------------|-------------------------------|---------------------------------------------------------|----------------------|
| <i>LIACT</i> | KP257588                      | F: TAATGGTTGGGATGGGTCAG<br>R: CAAGGTGAGAATACCCCTCT      | 165                  |
| <i>LIACS</i> | KF573522                      | F: TTCATTCAAGAAGGCAATGGT<br>R: GGTTTGGGTCAAAGTCACC      | 53                   |
| <i>LIACO</i> | KF573523                      | F: GTGATGAAGGAATTTGCACAAG<br>R: CCAAGGTTTTACACAGCAA     | 53                   |
| <i>LIBOP</i> | KC792647                      | F: GGAACTCGTCAAGCTCATGG<br>R: GGCGTAGTGTAAGGCCAATG      | 133                  |
| <i>LIIDL</i> | KT716180                      | F: ACAGCACCATGGTCACTTTTC<br>R: TTGTGTTTCCTTGAGGGAGTG    | 137                  |
| <i>LIZEP</i> | KF887951                      | F: GGGTTTCCGGTTCTTGGTAT<br>R: AAAGCCATTCGACTAATAACTCTTG | 165                  |
